# Supplementary material for: Influence of cholesterol/caveolin-1/caveolae homeostasis on membrane properties and substrate adhesion characteristics of adult human mesenchymal stem cells
Source: PubMed Central journal article supplement (PMC5883280; doi:10.1186/s13287-018-0830-4), 2018-04-03
Supplement: 13287_2018_830_MOESM1_ESM.pdf [file 13287_2018_830_MOESM1_ESM.pdf]

**Additional file1.** Cell groups used in this study. Related to Figures 1-7.

| Group | Donor MSCs         |
|-------|--------------------|
| 1     | 57m, 61m, 58m      |
| 2     | 47f, 62f, 54f      |
| 3     | 62m, 65m, 58f, 66f |

**Additional file 1.** Cell groups used in this study. Each cell group was generated by pooling MSCs from 3-4 donors. Donor MSCs are specified by age (number) and gender (m, male; f, female).
